# Supplementary material for: Facile synthesis of defect-rich RuCu nanoflowers for efficient hydrogen evolution reaction in alkaline media
Source: Royal Society of Chemistry journal article supplement (doi:10.1039/d2na00840h), 2022-12-23
Supplement: d2na00840h1.pdf [file d2na00840h1.pdf]

## Supporting Information

### Facile Synthesis of Defect-rich RuCu Nanoflowers for Efficient Hydrogen Evolution Reaction in Alkaline Media

Liang Ji,<sup>‡a</sup> Sai Luo,<sup>‡cd</sup> Lei Li,<sup>‡a</sup> Ningkang Qian,<sup>a</sup> Xiao Li,<sup>c</sup> Junjie Li,<sup>a</sup> Jingbo Huang,<sup>a</sup> Xingqiao Wu,<sup>\*e</sup> Hui Zhang,<sup>\*ab</sup> Deren Yang<sup>ab</sup>

<sup>a</sup>.State Key Laboratory of Silicon Materials and School of Materials Science and Engineering, Zhejiang University, Hangzhou, Zhejiang 310027, People's Republic of China.

<sup>b</sup>.Zhejiang Provincial Key Laboratory of Power Semiconductor Materials and Devices, ZJU-Hangzhou Global Scientific and Technological Innovation Center, Hangzhou, Zhejiang 311200, People's Republic of China

<sup>c</sup>.Sunrise Power Co., Ltd., Dalian, Liaoning 116024, People's Republic of China

<sup>d</sup>.Dalian Institute of Chemical Physics, Chinese Academy of Sciences, Dalian, Liaoning 116023, People's Republic of China

<sup>e</sup>. Institute for Carbon Neutralization, College of Chemistry and Materials Engineering, Wenzhou University, Wenzhou, Zhejiang 325035, People's Republic of China

\*Correspondence to: msezhanghui@zju.edu.cn

<sup>†</sup>These authors contributed equally

## Table of Contents

### 1. Supporting Results

- 1) S1-S2 Preparation of Ru<sub>3</sub>Cu NFs with different precursor.
- 2) S3 TEM image and corresponding size distribution.
- 3) S4 HADDF-STEM image of Ru<sub>3</sub>Cu NFs.
- 4) S5. EDX spectrum of the Ru<sub>3</sub>Cu NFs.
- 5) S6. XPS spectra of Ru 3p orbital in Ru/C.
- 6) S7. Characterization of the Ru<sub>2</sub>Cu NFs.
- 7) S8. Characterization of the Ru<sub>6</sub>Cu NFs.
- 8) S9. Mass activity of different electrocatalysts at -0.1 V vs RHE.
- 9) S10. Measured capacitive currents of different electrocatalysts.
- 11) S11 CV curves carried out in 0.1 M KOH of different electrocatalysts.
- 12) S12 Stability test of Ru<sub>3</sub>Cu NFs/C and Pt/C.
- 13) S13 TEM image and HER activity of Ru<sub>3</sub>Cu cluster.
- 14) S14 Stability test Ru<sub>2</sub>Cu NFs/C, (b) Ru<sub>6</sub>Cu NFs/C, (c) Ru/C
- 15) S15 Characterizations of Ru<sub>3</sub>Cu NFs/C after the durability test.
- 16) S16 Characterizations of Pt/C after the durability test
- 17) Table S1 Comparison of the recently reported HER catalysts.

### 2. References

## 1. Supporting Results

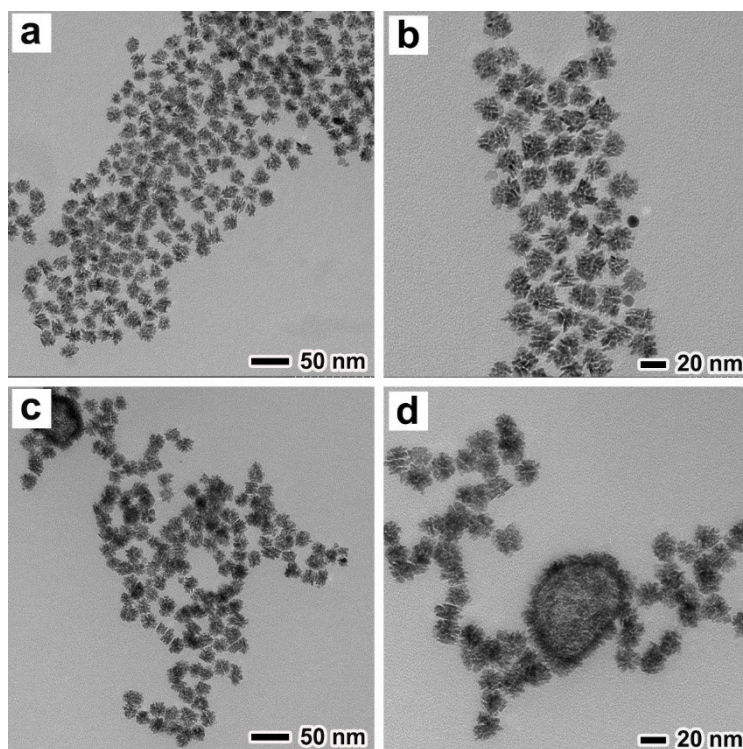

**Figure S1.** Representative TEM images of Ru<sub>3</sub>Cu NFs prepared by the standard procedure, except for different reducing agents. (a, b) Replacing 15 mg CA with 15 mg AA. (c, d) Replacing 15 mg CA with 15 mg glucose.

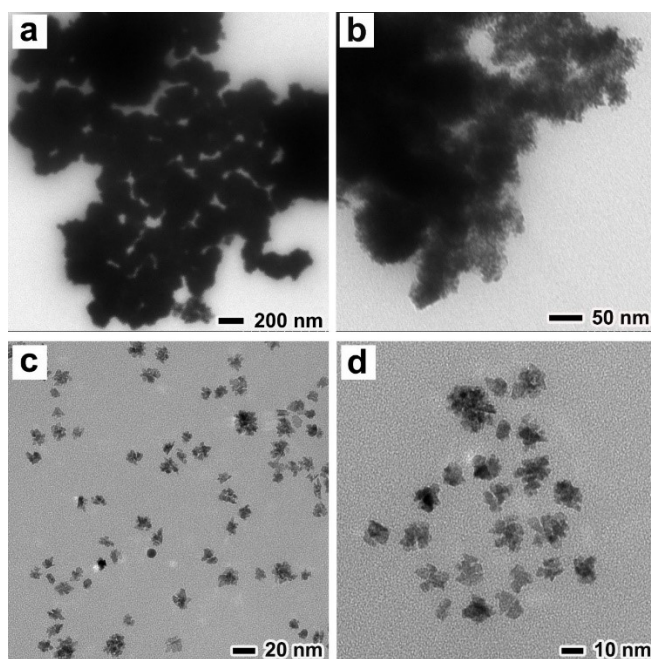

**Figure S2.** Representative TEM images of Ru<sub>3</sub>Cu NFs prepared by the standard procedure, except for: (a, b) in the the absence of PVP and (c, d) replacing benzyl alcohol with ethylene glycol.

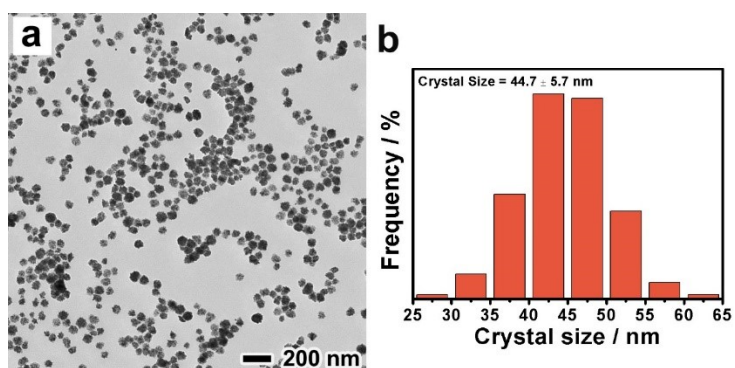

**Figure S3.** (a) Representative TEM image of the Ru<sub>3</sub>Cu NFs at low magnification and (b) the corresponding size distribution.

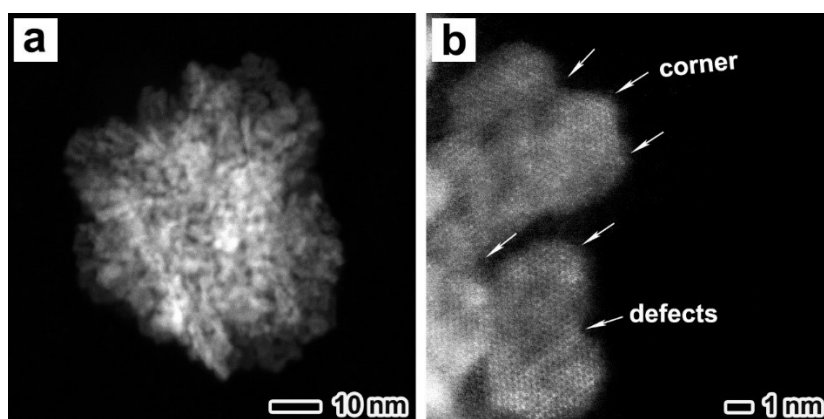

**Figure S4.** (a) HADDF-STEM image and (b) atomic-resolution HADDF-STEM images at a higher magnification of an individual  $\text{Ru}_3\text{Cu}$  NF.

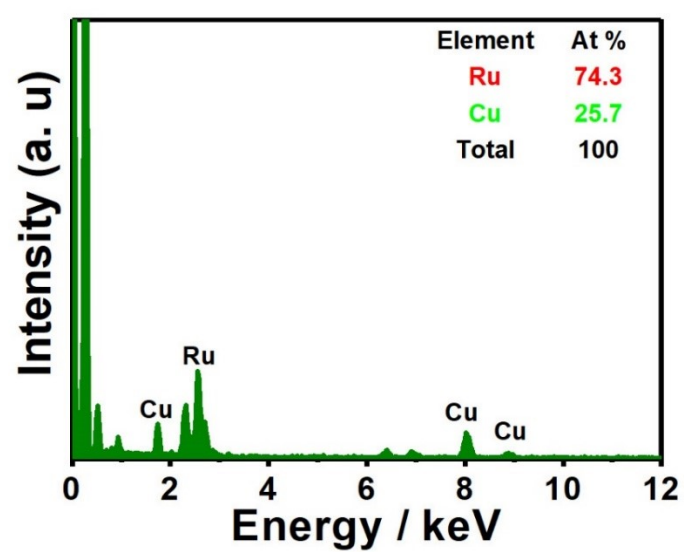

**Figure S5.** EDX spectrum of the Ru<sub>3</sub>Cu NFs.

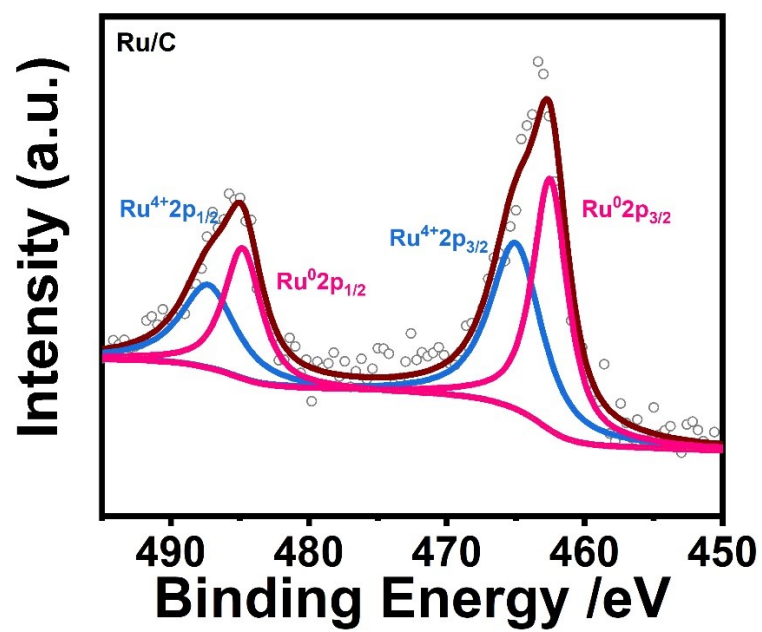

**Figure S6.** XPS spectra of Ru 3p orbital in Ru/C.



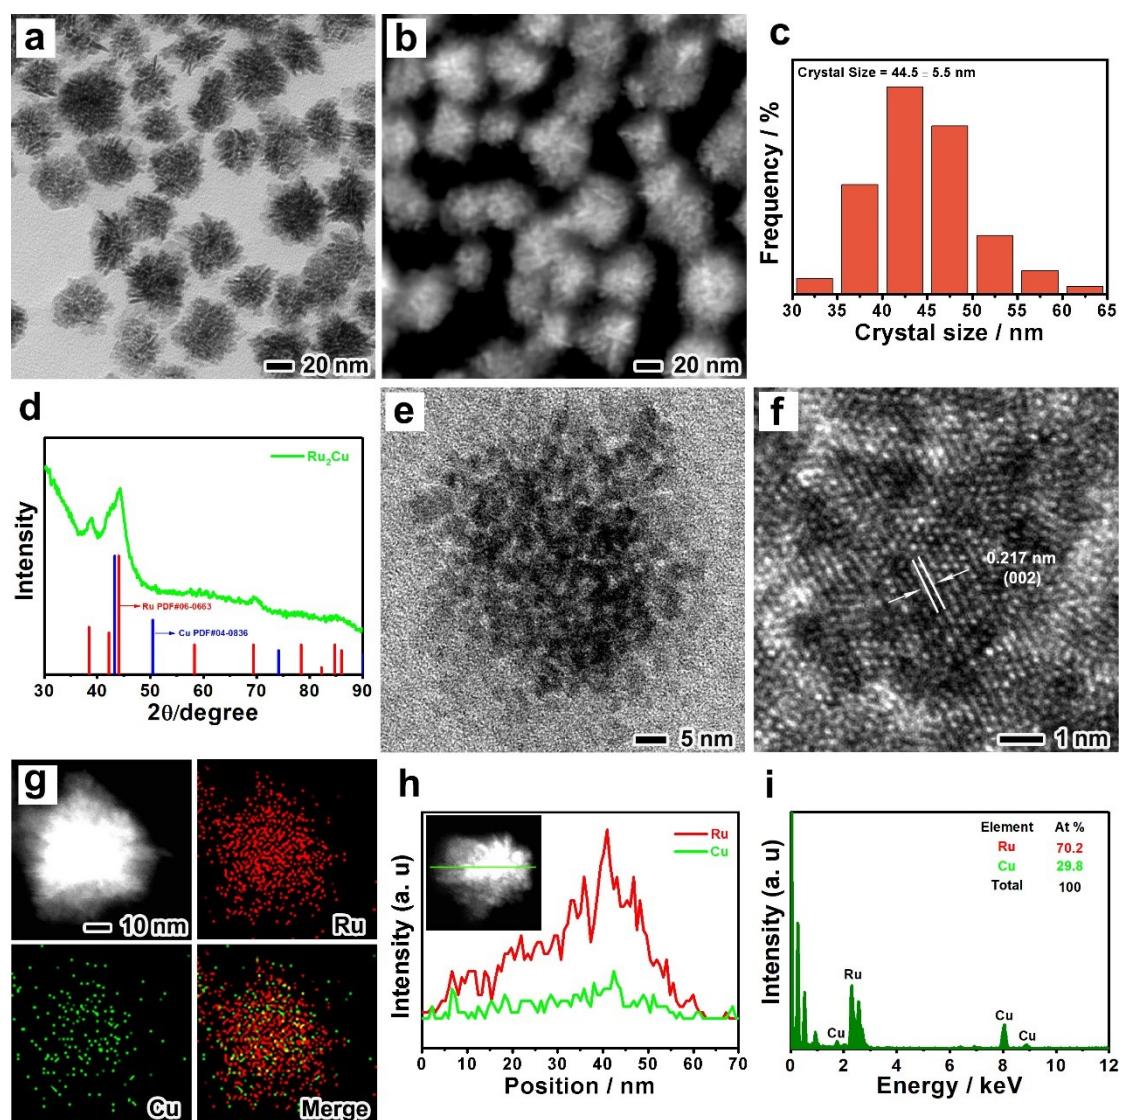

**Figure S7.** (a) TEM image, (b) HADDF-STEM image, (c) the corresponding size distribution, (d) XRD pattern, (e) HRTEM image, (f) HRTEM image from the selected area in (e), (g) EDX mapping, (h) EDX line-scan profile, and (i) EDX spectrum image of the Ru<sub>2</sub>Cu NFs.

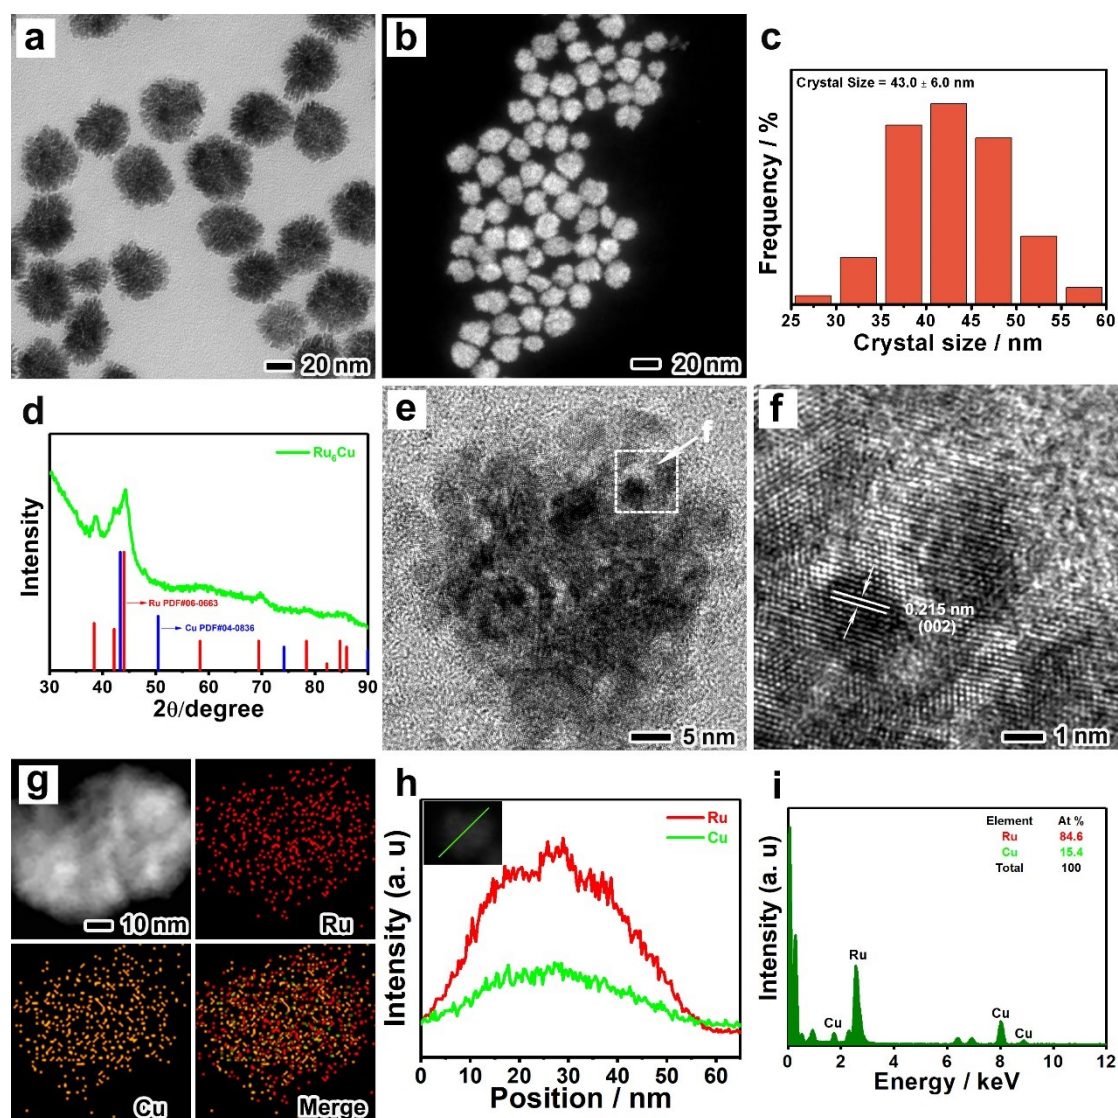

**Figure S8.** (a) TEM image, (b) HADDF-STEM image, (c) the corresponding size distribution, (d) XRD pattern, (e) HRTEM image, (f) HRTEM image from the selected area in (e), (g) EDX mapping, (h) EDX line-scan profile, and (i) EDX spectrum image of the Ru<sub>6</sub>Cu NFs.

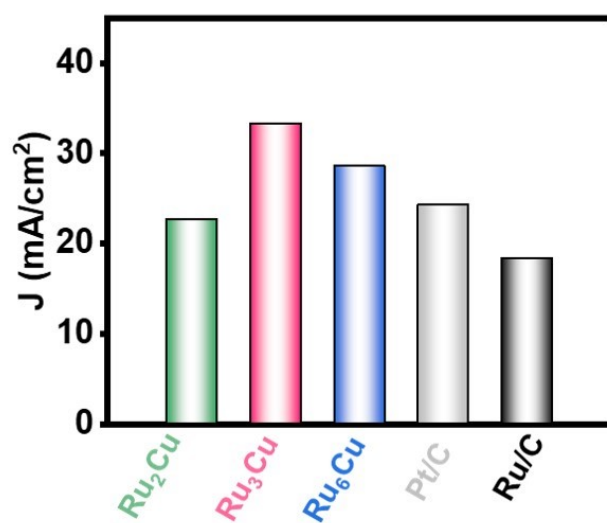

**Figure S9.** Mass activity of five electrocatalysts at -0.1 V vs RHE.

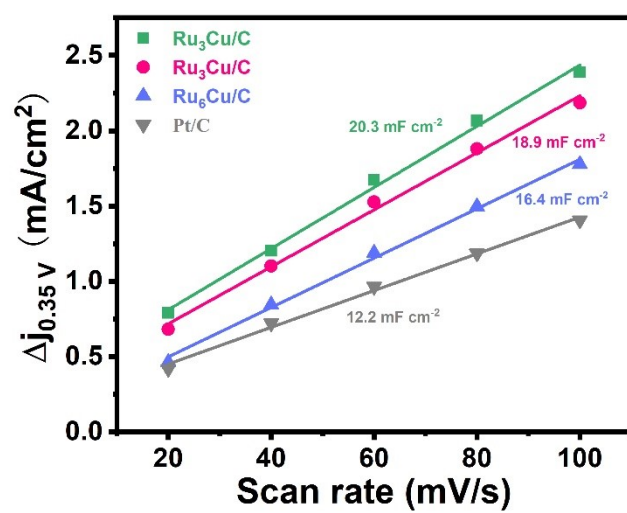

**Figure S10.** Measured capacitive currents for Ru<sub>2</sub>Cu NFs/C, Ru<sub>3</sub>Cu NFs/C, Ru<sub>6</sub>Cu NFs/C, and Pt/C.

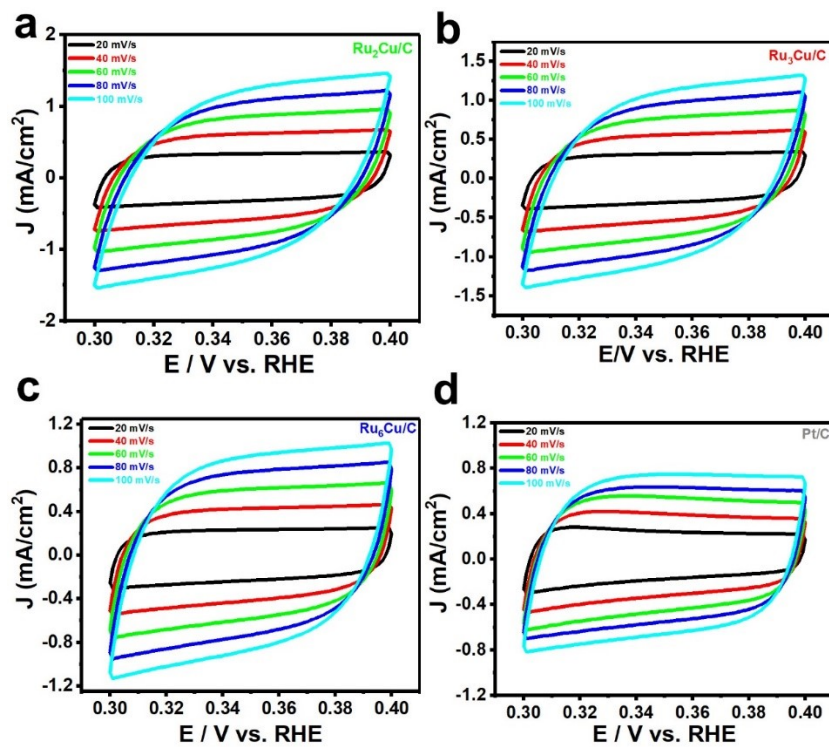

**Figure S11.** CV curves in 0.1 M KOH for (a)  $\text{Ru}_2\text{Cu}$  NFs/C, (b)  $\text{Ru}_3\text{Cu}$  NFs/C, (c)  $\text{Ru}_6\text{Cu}$  NFs/C and (d)  $\text{Pt}/\text{C}$  between 0.3 and 0.4 V vs. RHE with an increasing scan rate of 20 mV/s in 0.1 M KOH.

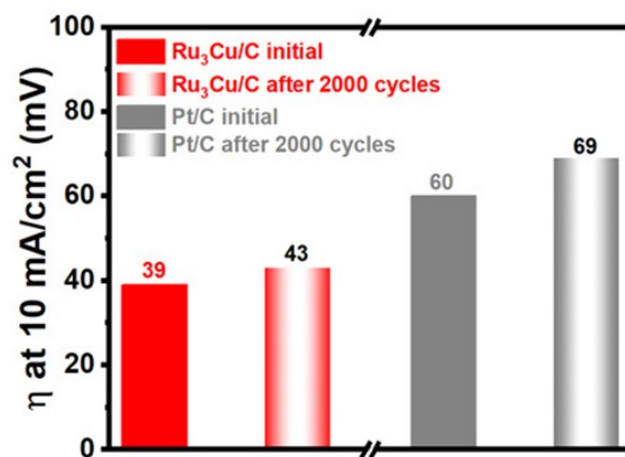

**Figure S12.** Overpotentials at 10 mA/cm<sup>2</sup> of Ru<sub>3</sub>Cu NFs/C and Pt/C before and after 2000 cycles between -0.2 V and 0.1V (vs. RHE) in 0.1 M KOH solution.

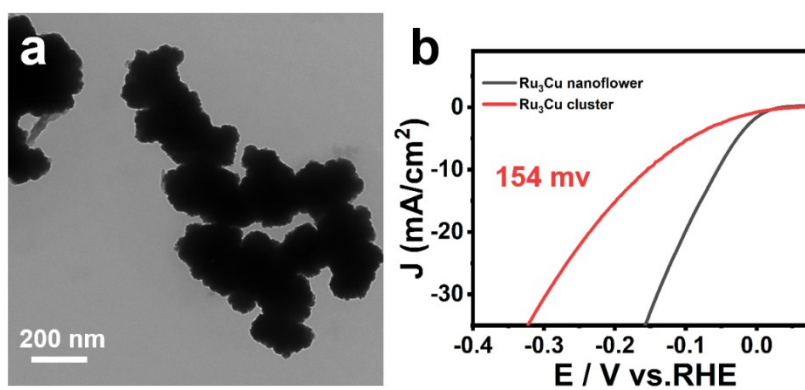

**Figure S13.** (a) TEM image of Ru<sub>3</sub>Cu cluster. (b) HER activity of Ru<sub>3</sub>Cu cluster and Ru<sub>3</sub>Cu NFs.



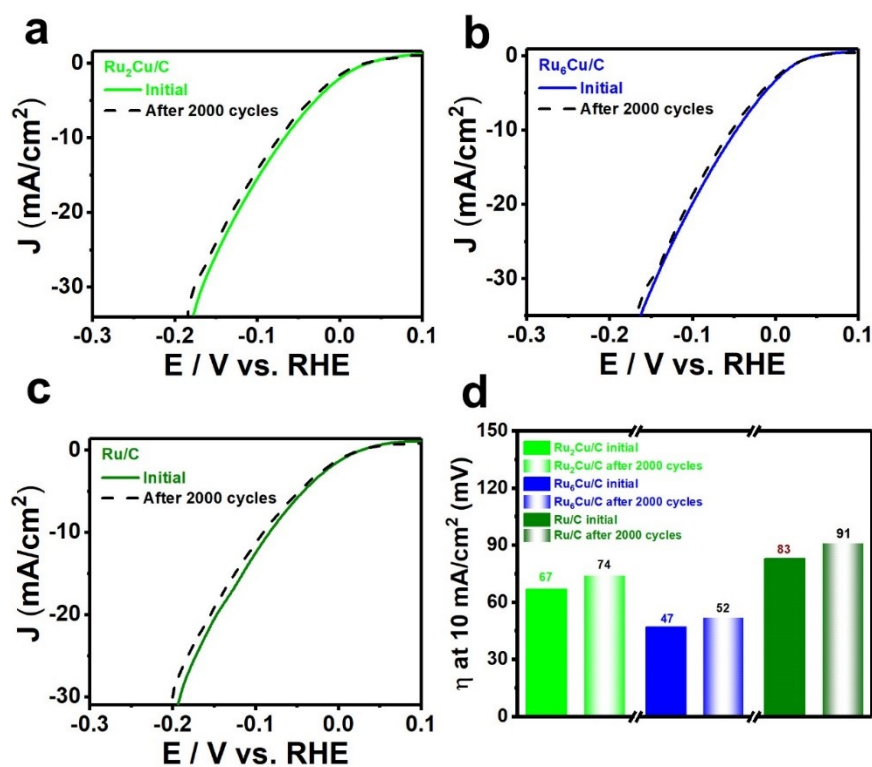

**Figure S14.** HER polarization curves of (a)  $\text{Ru}_2\text{Cu}$  NFs/C, (b)  $\text{Ru}_6\text{Cu}$  NFs/C, (c)  $\text{Ru/C}$  before and after 2000 cycles between -0.2 V and 0.1V (vs. RHE) in 0.1 M KOH solution. (d) Overpotentials at  $10 \text{ mA}/\text{cm}^2$  of the  $\text{Ru}_2\text{Cu}$  NFs/C,  $\text{Ru}_6\text{Cu}$  NFs/C,  $\text{Ru/C}$  before and after 2000 cycles.



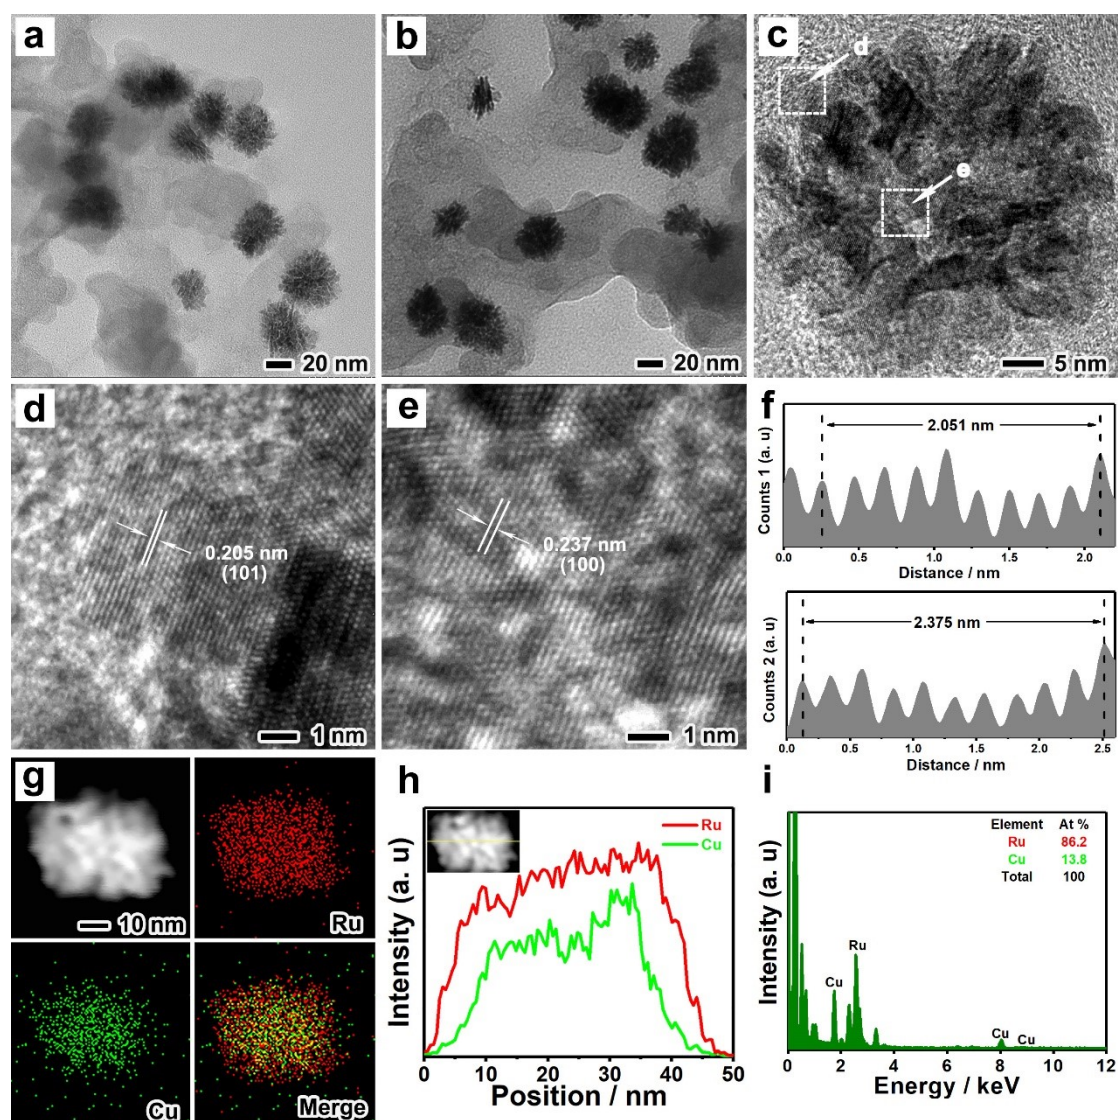

**Figure S15.** Representative TEM images of the Ru<sub>3</sub>Cu NFs/C (a) before and (b) after ADT. (c) HRTEM image, (d, e) HRTEM image from the selected area in (c), (f) line intensity profiles taken along the white solid arrow direction in (d, e), (g) HADDF-STEM-EDX mapping image, (h) EDX-line scan profile, and (i) EDX spectrum of the Ru<sub>3</sub>Cu NFs/C after 2000 cycles between -0.2 and 0.1 V versus RHE in Ar-saturated 0.1 M KOH solution.

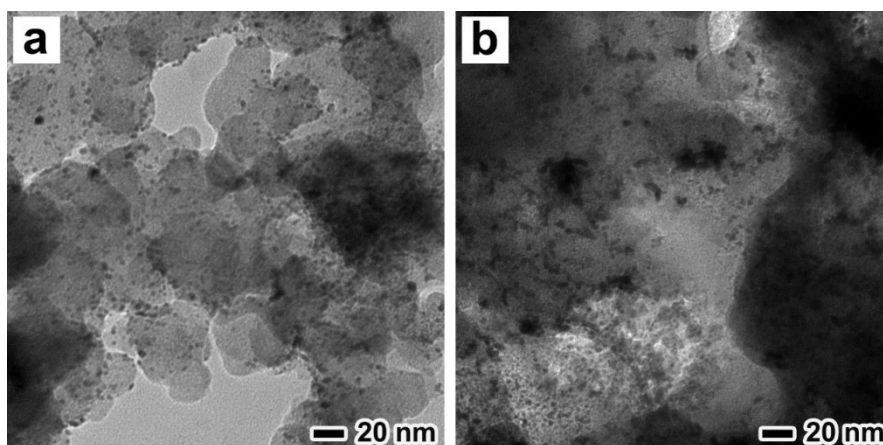

**Figure S16.** Representative TEM images of the commercial Pt/C (a) before and (b) after 2000 potential cycles between -0.2 and 0.1 V versus RHE in Ar-saturated 0.1 M KOH solution.

Table S1. Comparison of the recently reported HER catalysts.

| Catalysts                             | Overpotential<br>(10mA/cm <sup>2</sup> ) | Tafel slope<br>(mV/dec) | Solution   | Reference |
|---------------------------------------|------------------------------------------|-------------------------|------------|-----------|
| Ru <sub>2</sub> Ni <sub>2</sub> SNs/C | 39.3                                     | 25                      | 0.1 M KOH  | [1]       |
| Ir/Pt(poly)                           | 80                                       | 120                     | 0.1 M NaOH | [2]       |
| Ru-C <sub>3</sub> N <sub>4</sub> /C   | 79                                       | /                       | 0.1 M KOH  | [3]       |
| Pt/Ni-SP                              | 42                                       | 28.5                    | 1M NaOH    | [4]       |
| Co-Pt-Co/CC                           | 46                                       | 93.7                    | 1M NaOH    | [5]       |
| Cu <sub>2-x</sub> S@Ru                | 82                                       | 51                      | 1M NaOH    | [6]       |
| RuFeP-NCs/CNF                         | 65.8                                     | 43.44                   | 1M NaOH    | [7]       |
| Ru-NPs/SAs@N-TC                       | 97                                       | 58                      | 1M NaOH    | [8]       |
| 0.4-Ru@NG-750                         | 40                                       | 35.9                    | 1M NaOH    | [9]       |
| S-RuP@NPSC-900                        | 92                                       | 90                      | 1M NaOH    | [10]      |
| Ru <sub>3</sub> Cu NF                 | 55                                       | 54.7                    | 0.1 M NaOH | This work |

## 2. References

- [1] J. Ding, Q. Shao, Y. Feng, X. Huang, *Nano Energ.* **2018**, *47*, 1-7.
- [2] S. Štrbac, M. Smiljanić, T. Wakelin, J. Potočnik, Z. Rakočević, *Electro. Acta* **2019**, *306*, 18-27.
- [3] Y. Zheng, Y. Jiao, Y. Zhu, L. H. Li, Y. Han, Y. Chen, M. Jaroniec, S. Z. Qiao, *J. Am. Chem. Soc.* **2016**, *138*, 16174-16181.
- [4] S. A. Abbas, S. H. Kim, M. I. Iqbal, S. Muhammad, W. S. Yoon, K. D. Jung, *Sci. Rep.* **2018**, *8*, 2986.
- [5] W. Liu, Y. Tang, F. Liu, L. Gao, D. Yang, J. Yang, S.-J. Bao, *Int. J. Hydrogen. Energ.* **2022**.
- [6] D. Yoon, J. Lee, B. Seo, B. Kim, H. Baik, S. H. Joo, K. Lee, *Small* **2017**, *13*.
- [7] B. Yang, J. Xu, D. Bin, J. Wang, J. Zhao, Y. Liu, B. Li, X. Fang, Y. Liu, L. Qiao, L. Liu, B. Liu, *Appl. Catal. B-Environ.* **2021**, *283*, 119583.
- [8] B. Yan, D. Liu, X. Feng, M. Shao, Y. Zhang, *Adv. Funct. Mater.* **2020**, *30*, 2003007.
- [9] L. Bai, Z. Duan, X. Wen, R. Si, Q. Zhang, J. Guan, *ACS Catal.* **2019**, *9*, 9897-9904.
- [10] X. Liu, F. Liu, J. Yu, G. Xiong, L. Zhao, Y. Sang, S. Zuo, J. Zhang, H. Liu, W. Zhou, *Adv. Sci.* **2020**, *7*, 2001526.
